# Supplementary material for: Transposon Mutagenesis Identifies Novel Genes Associated with Staphylococcus aureus Persister Formation
Source: PubMed Central journal article supplement (PMC4689057; doi:10.3389/fmicb.2015.01437), 2015-12-23
Supplement: Image1.pdf [file Image1.pdf]

1

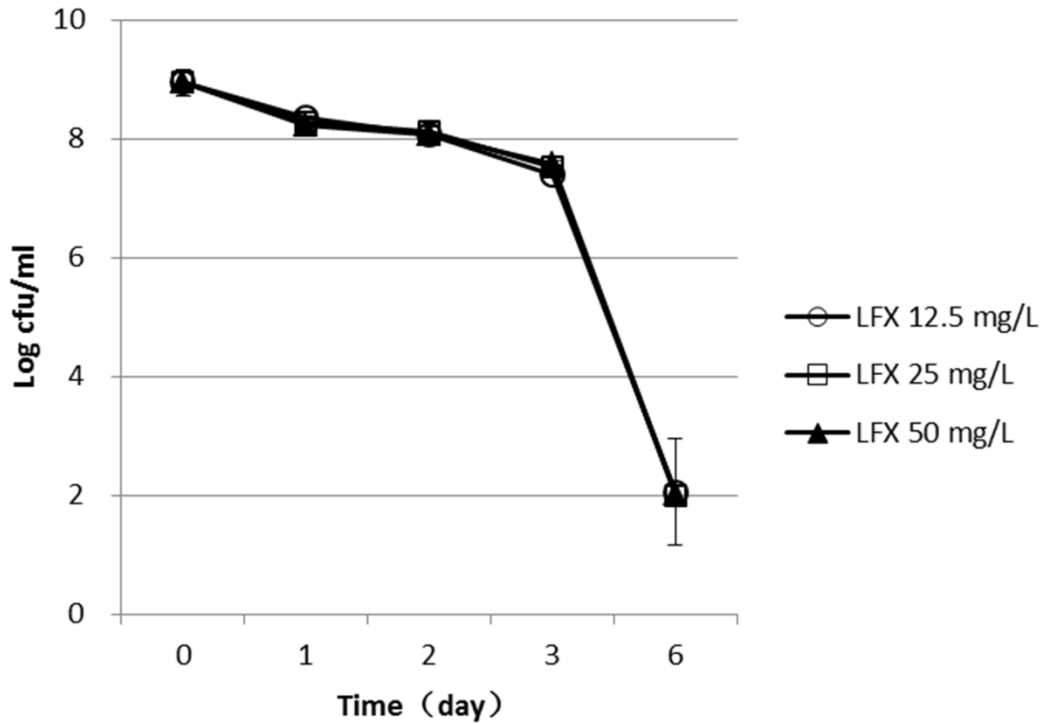

2

3

4 **Figure S1. Persister levels of the parent *S. aureus* strain USA500 at different**

5 **concentrations of levofloxacin in the persister assay.** The stationary-phase culture of

6 the parent strain USA500 was exposed to different concentrations of levofloxacin (LFX),

7 at 12.5, 25 and 50  $\mu\text{g/ml}$  and incubated at different times. The survival of the persisters

8 was monitored by CFU count after washing and plating on TSA plates. The vertical axis

9 represents CFU values in log scale, and the horizontal axis represents the time of

10 exposure. The error bars indicate standard deviations.

11

12

13
