# Supplementary material for: Transposon Mutagenesis Identifies Novel Genes Associated with Staphylococcus aureus Persister Formation
Source: PubMed Central journal article supplement (PMC4689057; doi:10.3389/fmicb.2015.01437), 2015-12-23
Supplement: Image2.pdf [file Image2.pdf]

1

**A**

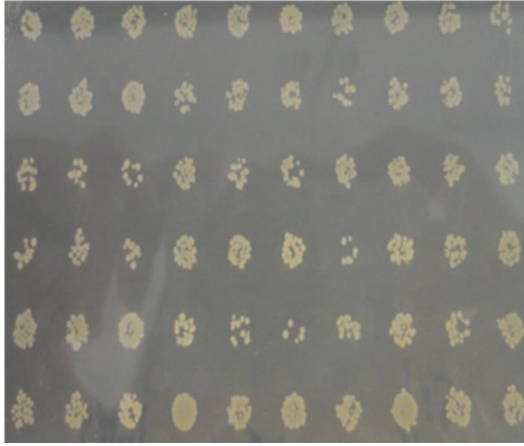

**B**

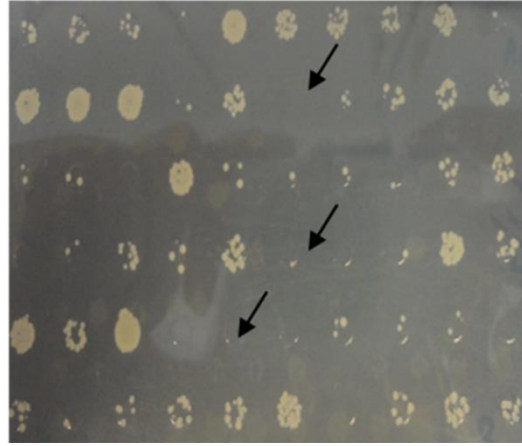

2

3

4 **Figure S2. The transposon library of *S. aureus* USA500 was screened for persister**

5 **deficiency mutants using persister assays with levofloxacin.** Stationary-phase cultures

6 of the transposon mutant library were exposed to 12.5  $\mu\text{g/ml}$  levofloxacin for 6 days. The

7 library was replica-transferred onto TSA plates to compare the levels of surviving

8 bacteria after 3 days (A) and 6 days (B) of drug exposure at 37  $^{\circ}\text{C}$ . The arrows indicate

9 selected representative mutants with obvious persister deficiency compared with the

10 parent strain USA500.

11
