# Supplementary material for: Transposon Mutagenesis Identifies Novel Genes Associated with Staphylococcus aureus Persister Formation
Source: PubMed Central journal article supplement (PMC4689057; doi:10.3389/fmicb.2015.01437), 2015-12-23
Supplement: Table2.pdf [file Table2.pdf]

1 **TABLE S2.** The PCR primers used in this study.

| Primer name       | Sequence (5'to3')                                          |
|-------------------|------------------------------------------------------------|
| erm-5.1           | GCTTCTAAGTCTTATTTCCATAAC                                   |
| erm-5.3           | TCTACATTACGCATTTGGAATAC                                    |
| erm-3.1           | TAGGTATACTACTGACAGCTTC                                     |
| erm-3.3           | TACTTATGAGCAAGTATTGTCTA                                    |
| arb-1             | GGCCACGCGTCGACTAGTCANNNNNNNNNNGATAT                        |
| arb-3             | GGCCACGCGTCGACTAGTCA                                       |
| ureG-att1         | ggggacaagttgtacaaaaagcaggctAAATTCAGAAAAACAAAAGCACGTCG      |
| ureG-rev1         | TTGTTTCATCCAAATTATAACCTCCTATGATATGAAAATTCTAACA             |
| ureG-rev2         | CATATCATAGGAGGTTATAATTTGGATGAACAACAATGGACTGGG              |
| ureG-att2         | ggggaccactttgtacaagaaagctgggtGGTTAATTGCGTTTAATAACATTGAACGA |
| sdhA-att1         | ggggacaagttgtacaaaaagcaggctCAAACACGTCAAAGACAGGCTTG         |
| sdhA-rev1         | AAAAATTTCACTCCCCTAAATTTTCAA                                |
| sdhA-rev2         | TAGGGGAGTGAAATTTTTGACTGAACAATCAGTGAAAAACACTCC              |
| sdhA-att2         | ggggaccactttgtacaagaaagctgggtCCATTAATTTACGAGCGATTTCAACT    |
| sdhB-att1         | ggggacaagttgtacaaaaagcaggctTATTATGGCAACGGGTGGCCC           |
| sdhB-rev1         | TATTTTTTACCCCCTTTAGACTTACTTGT                              |
| sdhB-rev2         | CTAAAGGGGGTAAAAATAAAATTAATCCCTTTGAGTTAAAATGTTATG           |
| sdhB-att2         | ggggaccactttgtacaagaaagctgggtCAATGCTTTTGCAGCAGCTTCTG       |
| ureG-Pro-F        | GCAGAATTCCTTTTCTTTGAATCATTACTCA                            |
| ureG-Pro-linker   | GATTTGCCACAATTAACCCCAATTTTCATAT                            |
| ureG-gene-linker  | GGGTTTTAATTGTGGCAAATCCGATTAATAAATT                         |
| ureG-gene-R       | ACGGGATCCTTATGATAATCCTTTGAGTAAAGTG                         |
| sdhAB-Pro-F       | ATTAGAGCTCTACTGGGCGTGAGAATCATTCT                           |
| sdhAB-Pro-linker  | TAAATGCGATGTAAAGGAGTCCCCCTGTGAA                            |
| sdhAB-gene-linker | GGGGACTCCTTTACATCGCATTTAACAAATATAGATTG                     |

sdhAB-gene-R TACAGTCGACTAATCTGCTTATTAATAAAAAATCCCTT

---

2

3

4

5
